# Supplementary material for: TRAIL-R Deficient Mice Are Protected from Neurotoxic Effects of Amyloid-β
Source: MDPI journal article supplement (doi:10.3390/ijms231911625), 2022-10-01
Supplement: s1 [file s1]

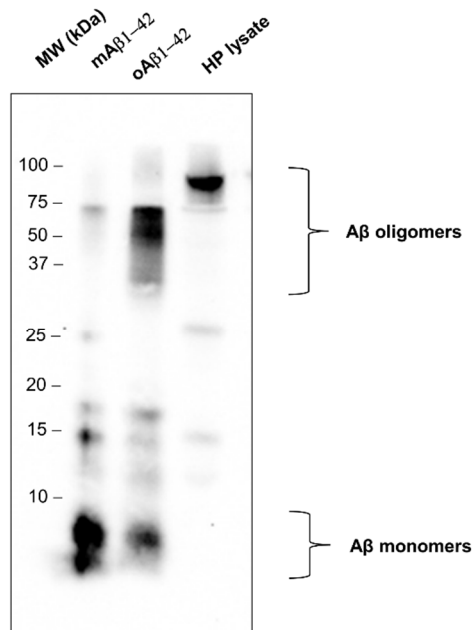

**Supplementary Figure S1.** Western blot for  $\beta$ -amyloid. Lane 1: Molecular weight marker; Lane 2: 1 $\mu$ g of the monomeric A $\beta$ 1-42 (mA $\beta$ 1-42) peptide; Lane 3: 1 $\mu$ g of the oligomeric A $\beta$ 1-42 (oA $\beta$ 1-42) peptide; Lane 4: 50 $\mu$ g of the hippocampal (HP) lysate.
